# Supplementary material for: Gynura procumbens Standardised Extract Reduces Cholesterol Levels and Modulates Oxidative Status in Postmenopausal Rats Fed with Cholesterol Diet Enriched with Repeatedly Heated Palm Oil
Source: Hindawi journal article supplement (doi:10.1155/2019/7246756), 2019-09-23
Supplement: f1 [file 7246756.f1.pdf]

## Supplementary Materials

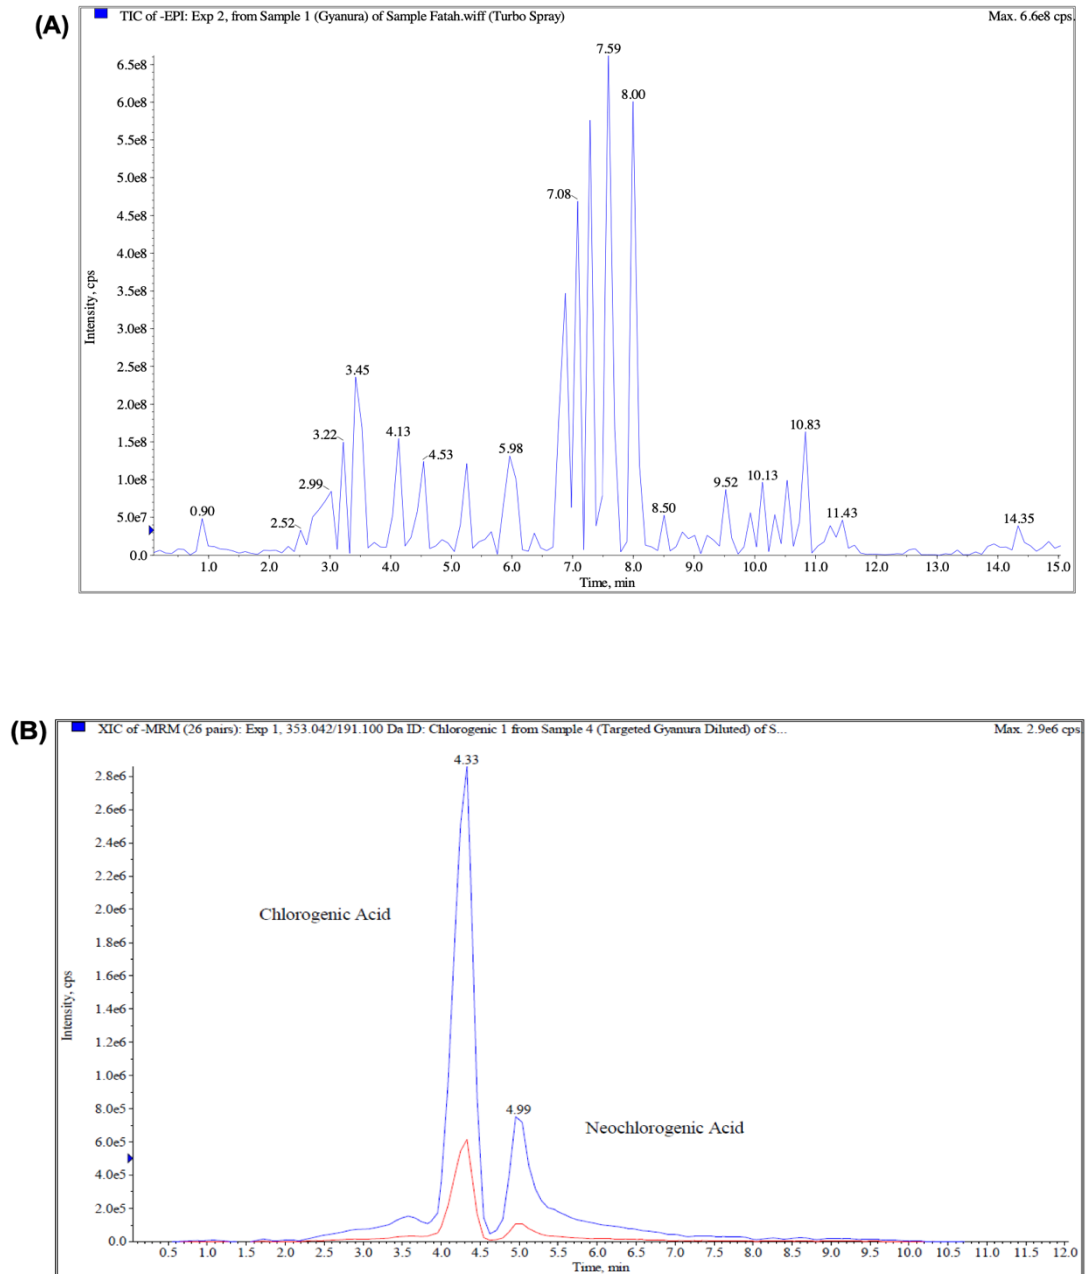

Figure S1. LC-MS/MS full chromatograms of *G. procumbens* (A) and chlorogenic acid (B).
